# Supplementary material
Source: PubMed Central journal article supplement (PMC7343238)
Supplement: cs0c00934_si_001.pdf [file cs0c00934_si_001.pdf]

# **The Solvent-Exposed Fe-S D-cluster Contributes to Oxygen-Resistance in *D. vulgaris* Ni-Fe Carbon Monoxide Dehydrogenase**

## **Supporting Information**

Elizabeth C. Wittenborn,<sup>‡+</sup> Chloé Guendon,<sup>§</sup> Mériem Merrouch,<sup>§</sup> Martino Benvenuti,<sup>§</sup> Vincent Fourmond,<sup>§</sup> Christophe Léger,<sup>§</sup> Catherine L. Drennan,<sup>‡†#&\*</sup> Sébastien Dementin<sup>§\*</sup>

From <sup>§</sup>CNRS, Aix-Marseille Université, Laboratoire de Bioénergétique et Ingénierie des Protéines, Institut de Microbiologie de la Méditerranée, 13009 Marseille, France; The Departments of <sup>‡</sup>Chemistry and <sup>†</sup>Biology and <sup>#</sup>Howard Hughes Medical Institute, Massachusetts Institute of Technology, Cambridge, MA 02139, USA. <sup>&</sup>Fellow, Bio-inspired Solar Energy Program, Canadian Institute for Advanced Research (CIFAR), Toronto, ON M5G 1M1, Canada.

Corresponding Authors

\*E-mail: cdrennan@mit.edu. \*E-mail: dementin@imm.cnrs.fr

Present Addresses

<sup>†</sup>California Institute for Quantitative Biosciences, University of California, Berkeley, CA 94720.

**Table S1.** Crystallographic data collection and refinement statistics for C45G/T50C Dv CODH.

|                                                                  | as-isolated             | O <sub>2</sub> -exposed<br>< 20 min                   | O <sub>2</sub> -exposed<br>2 hours                    | O <sub>2</sub> -exposed<br>2 days                     |
|------------------------------------------------------------------|-------------------------|-------------------------------------------------------|-------------------------------------------------------|-------------------------------------------------------|
| <b>Data collection</b>                                           |                         |                                                       |                                                       |                                                       |
| Space group                                                      | <i>P</i> 2 <sub>1</sub> | <i>P</i> 2 <sub>1</sub> 2 <sub>1</sub> 2 <sub>1</sub> | <i>P</i> 2 <sub>1</sub> 2 <sub>1</sub> 2 <sub>1</sub> | <i>P</i> 2 <sub>1</sub> 2 <sub>1</sub> 2 <sub>1</sub> |
| Cell dimensions                                                  |                         |                                                       |                                                       |                                                       |
| <i>a</i> , <i>b</i> , <i>c</i> (Å)                               | 65.6, 147.4,<br>66.1    | 66.1, 111.4,<br>193.9                                 | 65.5, 111.8,<br>194.5                                 | 65.6, 112.1,<br>194.4                                 |
| $\alpha$ , $\beta$ , $\gamma$ (°)                                | 90.0, 110.8,<br>90.0    | 90.0, 90.0,<br>90.0                                   | 90.0, 90.0,<br>90.0                                   | 90.0, 90.0,<br>90.0                                   |
| Wavelength (Å)                                                   | 0.9791                  | 0.9791                                                | 0.9791                                                | 0.9791                                                |
| Resolution (Å) ‡                                                 | 100–1.83<br>(1.87–1.83) | 100–2.50<br>(2.55–2.50)                               | 100–2.21<br>(2.26–2.21)                               | 100–2.78<br>(2.84–2.78)                               |
| Unique reflections ‡                                             | 102654 (7601)           | 50165 (3647)                                          | 72260 (5304)                                          | 36890 (2707)                                          |
| <i>R</i> <sub>sym</sub> (%) ‡                                    | 8.6 (77.7)              | 19.0 (68.7)                                           | 13.2 (78.2)                                           | 15.1 (95.2)                                           |
| CC <sub>1/2</sub> ‡                                              | 99.9 (82.9)             | 98.3 (66.6)                                           | 99.5 (68.3)                                           | 99.4 (67.7)                                           |
| < <i>I</i> / $\sigma$ ( <i>I</i> ) > ‡                           | 13.8 (2.4)              | 6.8 (2.0)                                             | 10.1 (2.1)                                            | 11.6 (2.0)                                            |
| Completeness (%) ‡                                               | 99.7 (99.8)             | 99.5 (99.5)                                           | 99.8 (99.9)                                           | 99.8 (100)                                            |
| Multiplicity ‡                                                   | 6.8 (6.7)               | 4.7 (4.6)                                             | 5.3 (5.5)                                             | 6.2 (6.2)                                             |
| <b>Refinement</b>                                                |                         |                                                       |                                                       |                                                       |
| Resolution (Å)                                                   | 73.68–1.83              | 73.63–2.50                                            | 97.71–2.21                                            | 73.45–2.78                                            |
| <i>R</i> <sub>work</sub> / <i>R</i> <sub>free</sub> <sup>§</sup> | 0.147/0.178             | 0.181/0.211                                           | 0.174/0.203                                           | 0.179/0.214                                           |
| No. atoms                                                        |                         |                                                       |                                                       |                                                       |
| protein                                                          | 9400                    | 9201                                                  | 9238                                                  | 9133                                                  |
| B-cluster                                                        | 16                      | 16                                                    | 16                                                    | 16                                                    |
| C-cluster                                                        | 36 <sup>¶</sup>         | 18                                                    | 18                                                    | 18                                                    |
| D-cluster                                                        | 8                       | 8                                                     | 0                                                     | 0                                                     |
| water                                                            | 803                     | 351                                                   | 684                                                   | 118                                                   |
| Average <i>B</i> -factors (Å <sup>2</sup> )                      |                         |                                                       |                                                       |                                                       |
| protein                                                          | 29.0                    | 26.9                                                  | 31.4                                                  | 41.4                                                  |
| B-cluster                                                        | 20.5                    | 20.9                                                  | 22.7                                                  | 41.2                                                  |
| C-cluster                                                        | 28.4                    | 52.4                                                  | 55.3                                                  | 75.7                                                  |

|                      |       |       |       |              |
|----------------------|-------|-------|-------|--------------|
| D-cluster            | 23.0  | 34.0  | –     | –            |
| water                | 39.8  | 29.7  | 37.0  | 34.6         |
| R.m.s. deviations    |       |       |       |              |
| bond lengths (Å)     | 0.009 | 0.005 | 0.004 | 0.004        |
| bond angles (°)      | 1.15  | 1.15  | 0.71  | 0.82         |
| Rotamer outliers (%) | 0.62  | 0.32  | 0.63  | 0.65         |
| Ramachandran (%)     |       |       |       |              |
| favored              | 96.6  | 96.5  | 96.3  | 96.8         |
| allowed              | 3.1   | 3.2   | 3.3   | 3.0          |
| disallowed           | 0.3   | 0.3   | 0.4   | 0.2          |
| Residues (of 629)    |       |       |       |              |
| chain A              | 4–629 | 5–629 | 4–629 | 5–40; 43–629 |
| chain B              | 4–628 | 4–629 | 4–627 | 4–40; 43–629 |

<sup>‡</sup>Values in parenthesis indicate highest resolution bin.

<sup>§</sup>A total of 4–5% of reflections were set aside during refinement for cross-validation.

<sup>¶</sup>For this structure, the C-clusters were refined as a mixture of reduced (80%) and oxidized (20%) conformations, resulting in the presence of 36 C-cluster atoms rather than 18.

**Table S2.** Crystallographic data collection statistics for iron anomalous data.

|                                    | as-isolated             | O <sub>2</sub> -exposed<br>< 20 min                                | O <sub>2</sub> -exposed<br>2 hours                                 |
|------------------------------------|-------------------------|--------------------------------------------------------------------|--------------------------------------------------------------------|
|                                    | Fe peak*                | Fe peak*                                                           | Fe peak*                                                           |
| <b>Data collection</b>             |                         |                                                                    |                                                                    |
| Space group                        | <i>P2</i> <sub>1</sub>  | <i>P2</i> <sub>1</sub> <i>2</i> <sub>1</sub> <i>2</i> <sub>1</sub> | <i>P2</i> <sub>1</sub> <i>2</i> <sub>1</sub> <i>2</i> <sub>1</sub> |
| Cell dimensions                    |                         |                                                                    |                                                                    |
| <i>a</i> , <i>b</i> , <i>c</i> (Å) | 65.8, 147.5, 66.1       | 66.1, 111.6, 194.2                                                 | 65.6, 112.1, 195.2                                                 |
| $\alpha$ , $\beta$ , $\gamma$ (°)  | 90.0, 110.8, 90.0       | 90.0, 90.0, 90.0                                                   | 90.0, 90.0, 90.0                                                   |
| Wavelength (Å)                     | 1.7389                  | 1.7389                                                             | 1.7389                                                             |
| Resolution (Å) ‡                   | 100–2.27<br>(2.32–2.27) | 100–2.80<br>(2.86–2.80)                                            | 100–2.60<br>(2.66–2.60)                                            |
| Unique reflections ‡               | 105228 (7670)           | 67913 (5089)                                                       | 85290 (2666)                                                       |
| <i>R</i> <sub>sym</sub> (%) ‡      | 13.4 (78.7)             | 19.2 (89.3)                                                        | 12.2 (84.0)                                                        |
| CC <sub>1/2</sub> ‡                | 99.2 (68.7)             | 98.6 (68.7)                                                        | 99.5 (64.1)                                                        |
| $\langle I / \sigma(I) \rangle$ ‡  | 8.1 (2.2)               | 8.4 (2.0)                                                          | 11.1 (1.8)                                                         |
| Completeness (%) ‡                 | 98.0 (97.9)             | 99.4 (99.4)                                                        | 99.7 (99.3)                                                        |
| Multiplicity ‡                     | 4.2 (4.1)               | 5.2 (5.2)                                                          | 4.6 (4.5)                                                          |

\*Bijvoet pairs were not merged during data processing.

‡Values in parenthesis indicate highest resolution bin.

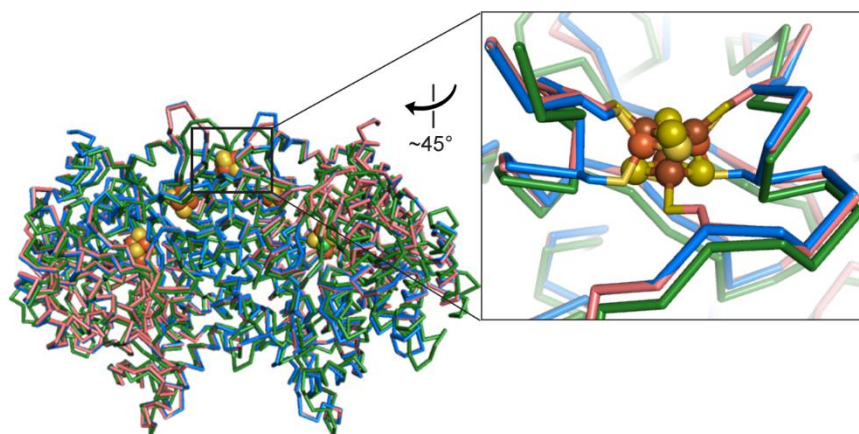

**Figure S1.**

The structure of C45G/T50C Dv CODH aligns well with those of other CODHs. Shown is the C45G/T50C Dv CODH structure (pink) aligned with that of WT Dv CODH (blue,  $C\alpha$  r.m.s.d of 0.27 Å for 1250  $C\alpha$  atoms) and *C. hydrogenoformans* CODH II (green,  $C\alpha$  r.m.s.d of 1.27 Å for 1250  $C\alpha$  atoms). Proteins are shown as the  $C\alpha$  trace of each structure with metalloclusters shown as spheres with Fe in orange, S in yellow, and Ni in green. The inset shows structural similarity in the vicinity of the D-cluster between CODHs regardless of the cluster type at this position. In the inset, the [4Fe-4S] D-cluster of C45G/T50C Dv CODH is displayed along with the [2Fe-2S] D-cluster of WT Dv CODH, with the [4Fe-4S] cluster colored in darker shades.

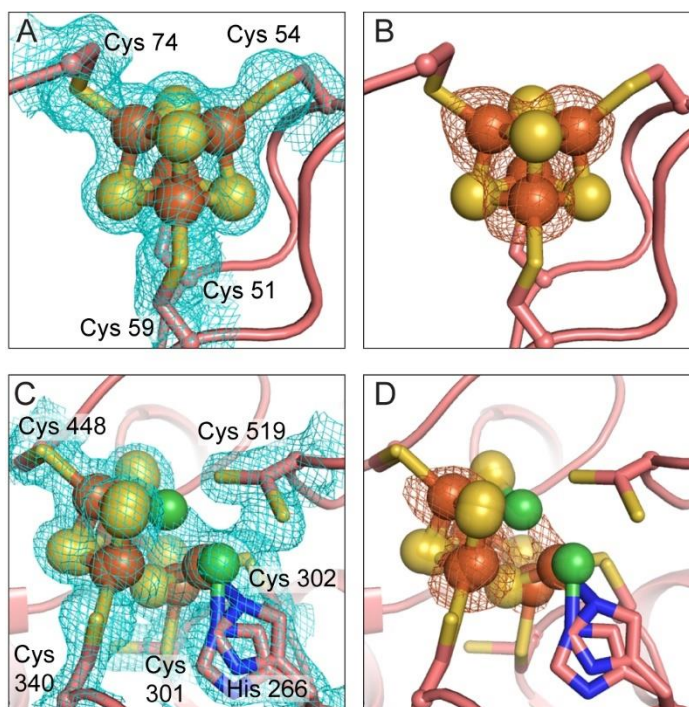

**Figure S2.**

The B- and C-clusters of as-isolated C45G/T50C Dv CODH. A)  $2Fo-Fc$  electron density (blue mesh; contoured to  $1\sigma$ ) for the B-cluster. B) Iron anomalous difference map (orange mesh; contoured to  $5\sigma$ ) for the B-cluster. C)  $2Fo-Fc$  electron density (blue mesh; contoured to  $1\sigma$ ) for the C-cluster. Note that the C-cluster is observed in both the reduced (80% occupancy) and oxidized (20% occupancy) conformations, with the Ni ion refined with an occupancy of 20% in each conformation. D) Iron anomalous difference map (orange mesh; contoured to  $5\sigma$ ) for the C-cluster. Protein is shown as in Figures 2 and 4.

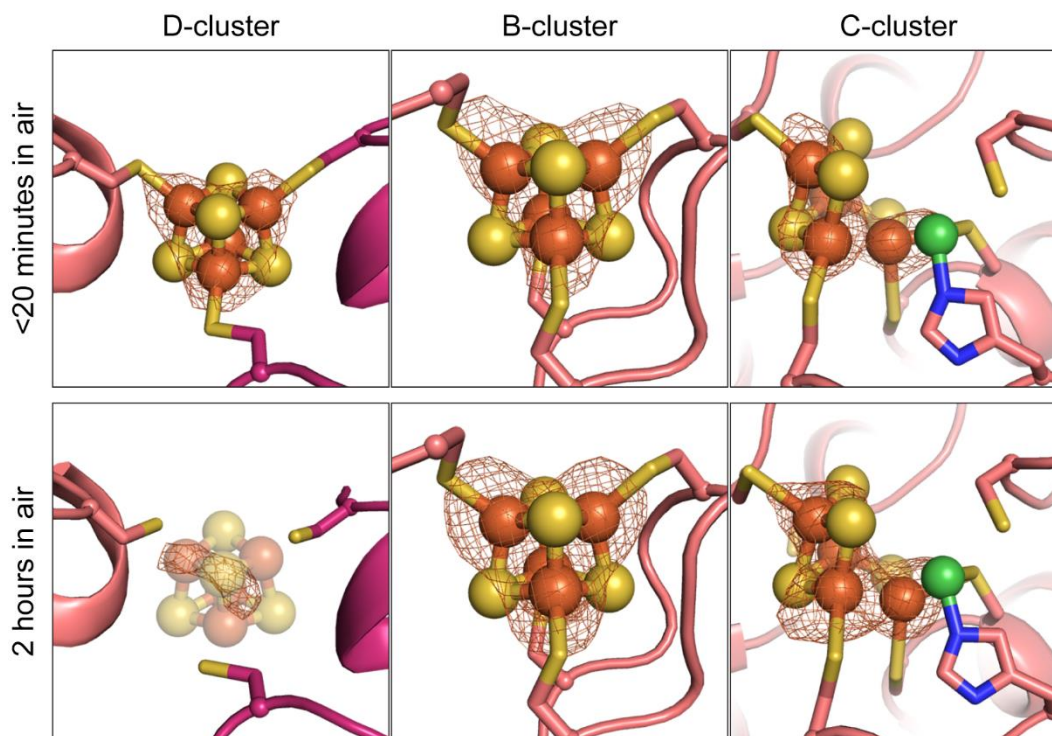

**Figure S3.**

Iron anomalous diffraction data for air-exposed C45G/T50C Dv CODH. Iron anomalous difference maps (orange mesh, contoured to  $4\sigma$ ) calculated from data collected at the iron peak wavelength (7130 eV, 1.7389 Å). Protein is shown as in Figures 2 and 4.

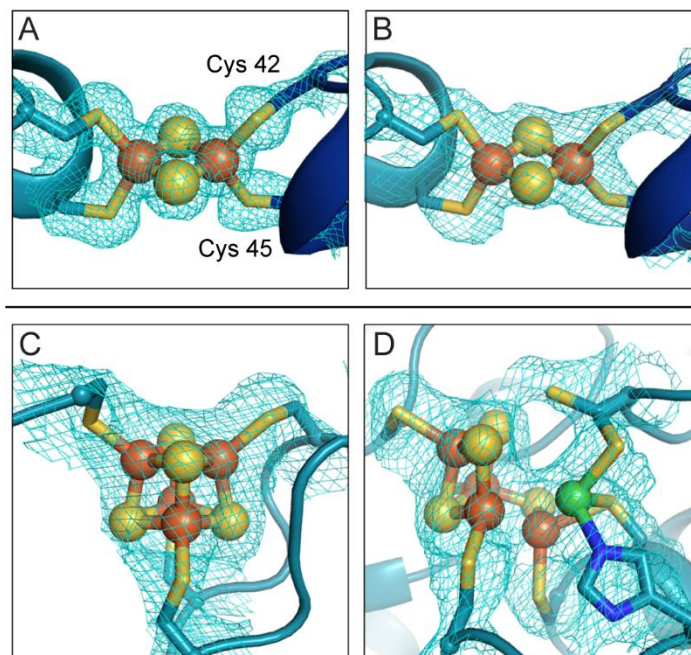

**Figure S4.**

Stability of the metalloclusters in WT Dv CODH over time in air. A) [2Fe-2S] D-cluster of WT Dv CODH in crystals maintained under anaerobic conditions (PDB ID 6B6W). B) D-cluster of WT Dv CODH after the crystal was exposed for 2 days to ambient atmospheric conditions (PDB ID 6B6Y). C) The B-cluster of WT Dv CODH after 2 days in air (PDB ID 6B6Y). D) The oxidized C-cluster of WT Dv CODH after 2 days in air (PDB ID 6B6Y).  $2F_o-F_c$  electron density (blue mesh) contoured to  $1\sigma$ . Protein shown as in Figures 2 and 4 with protein ribbon representation in blue. Figure panels have been reproduced with permission from Reference 1. Copyright 2018, the authors. Reproduced under CC-BY 4.0 license.

## References

- (1) Wittenborn, E. C.; Merrouch, M.; Ueda, C.; Fradale, L.; Léger, C.; Fourmond, V.; Pandelia, M.-E.; Dementin, S.; Drennan, C. L. Redox-Dependent Rearrangements of the NiFeS Cluster of Carbon Monoxide Dehydrogenase. *eLife* **2018**, *7*, e39451.
